# Supplementary material for: Assessment of Household Catastrophic Total Cost of Tuberculosis and Its Determinants in Cairo: Prospective Cohort Study
Source: PubMed Central journal article supplement — Tuberc Respir Dis (Seoul). 2021 Sep 3;85(2):165–74. doi: 10.4046/trd.2021.0028 (PMC8987667; doi:10.4046/trd.2021.0028), 2021-09-03
Supplement: trd-2021-0028-suppl1.pdf [file trd-2021-0028-suppl1.pdf]

**Supplementary Table S1. The estimated cost (US\$\*) incurred by TB patients according to sex**

| Cost           | Sex                  | No. | Pre-treatment                          | Treatment period         |                          |                          | Total period                |
|----------------|----------------------|-----|----------------------------------------|--------------------------|--------------------------|--------------------------|-----------------------------|
|                |                      |     | Pre-diagnosis                          | First 2 mo               | Second 2 mo              | Third 2 mo               | Entire illness              |
| Medical        | Male                 | 91  | 16.9 (4.4–28.1)<br>[26.9] <sup>†</sup> | 0.0 (0.0–0.0)<br>[2.8]   | 0.0 (0.0–0.0)<br>[1.8]   | 0.0 (0.0–0.0)<br>[3.7]   | 17.5 (6.3–37.5)<br>[12.2]   |
|                | Female               | 60  | 14.7 (9.4–24.9)<br>[27.6]              | 0.0 (0.0–0.0)<br>[2.3]   | 0.0 (0.0–0.0)<br>[2.1]   | 0.0 (0.0–0.0)<br>[3.5]   | 17.8 (11.3–35.1)<br>[10.9]  |
|                | p-value <sup>‡</sup> |     | 0.561                                  | 0.963                    | 0.550                    | 0.322                    | 0.359                       |
| Travel         | Male                 | 91  | 3.8 (1.3–12.5)<br>[11.8]               | 5.0 (2.6–9.4)<br>[12.2]  | 3.4 (1.9–6.3)<br>[10.0]  | 1.9 (0.9–3.8)<br>[9.3]   | 19.3 (10.9–28.8)<br>[11.4]  |
|                | Female               | 60  | 6.9 (2.5–17.9)<br>[19.2]               | 6.4 (3.1–9.4)<br>[10.8]  | 3.8 (2.5–5.6)<br>[7.1]   | 2.1 (1.3–3.8)<br>(5.7%)  | 22.9 (15.2–36.7)<br>[11.8]  |
|                | p-value <sup>‡</sup> |     | 0.021                                  | 0.442                    | 0.756                    | 0.503                    | 0.047                       |
| Food           | Male                 | 91  | 0.0 (0.0–3.1)<br>[5.4]                 | 0.0 (0.0–0.0)<br>[6.2]   | 0.0 (0.0–0.0)<br>[6.9]   | 0.0 (0.0–0.0)<br>[3.9]   | 0.0 (0.0–9.4)<br>[5.7]      |
|                | Female               | 60  | 0.8 (0.0–4.5)<br>[5.3]                 | 0.0 (0.0–4.6)<br>[7.2]   | 0.0 (0.0–3.8)<br>[9.4]   | 0.0 (0.0–1.3)<br>[7.9]   | 3.4 (0.0–20.2)<br>[7.2]     |
|                | p-value <sup>‡</sup> |     | 0.067                                  | 0.364                    | 0.035                    | 0.016                    | 0.022                       |
| Total direct   | Male                 | 91  | 22.5 (7.5–51.3)<br>[44.1]              | 7.2 (3.8–13.1)<br>[21.2] | 3.8 (2.5–7.5)<br>[19.6]  | 2.5 (1.1–3.8)<br>[16.9]  | 44.3 (28.1–78.9)<br>[29.3]  |
|                | Female               | 60  | 27.8 (13.8–70.8)<br>[52.0]             | 8.6 (3.8–15.5)<br>[20.2] | 5.0 (2.5–10.0)<br>[18.6] | 2.9 (1.3–9.1)<br>[17.0]  | 64.4 (31.3–111.5)<br>[29.9] |
|                | p-value <sup>‡</sup> |     | 0.062                                  | 0.461                    | 0.295                    | 0.082                    | 0.022                       |
| Total indirect | Male                 | 91  | 0.0 (0.0–75.0)<br>[55.9]               | 0.0 (0.0–93.8)<br>[78.8] | 0.0 (0.0–62.5)<br>[80.4] | 0.0 (0.0–31.3)<br>[83.1] | 0.0 (0.0–268.8)<br>[70.7]   |
|                | Female               | 60  | 0.0 (0.0–71.9)<br>[47.9]               | 0.0 (0.0–93.8)<br>[79.8] | 0.0 (0.0–93.8)<br>[81.4] | 0.0 (0.0–93.8)<br>[83.0] | 0.0 (0.0–375.0)<br>[70.1]   |
|                | p-value <sup>‡</sup> |     | 0.669                                  | 0.169                    | 0.145                    | 0.048                    | 0.343                       |
| Total cost     | Male                 | 91  | 60.6 (18.8–112.5)                      | 15.0 (5.6–95.5)          | 7.5 (3.4–65.0)           | 3.8 (1.9–40.0)           | 105.1 (37.5–310.0)          |
|                | Female               | 60  | 74.5 (24.5–122.7)                      | 34.1 (6.3–128.9)         | 10.0 (2.9–123.3)         | 10.8 (1.9–111.7)         | 173.9 (61.7–457.0)          |
|                | p-value <sup>‡</sup> |     | 0.166                                  | 0.311                    | 0.344                    | 0.054                    | 0.089                       |

Values are presented as median (IQR) [%].

\*One US\$=16 Egyptian pound (EGP) using mean UN exchange rate for the USD in December 2019. <sup>†</sup>Percentage equal mean of the cell divided by the mean of the total column. <sup>‡</sup>Using the Mann-Whitney test.

TB: tuberculosis; IQR: interquartile range.
