# Supplementary material for: Assessment of Household Catastrophic Total Cost of Tuberculosis and Its Determinants in Cairo: Prospective Cohort Study
Source: PubMed Central journal article supplement — Tuberc Respir Dis (Seoul). 2021 Sep 3;85(2):165–74. doi: 10.4046/trd.2021.0028 (PMC8987667; doi:10.4046/trd.2021.0028), 2021-09-03
Supplement: trd-2021-0028-suppl2.pdf [file trd-2021-0028-suppl2.pdf]

**Supplementary Table S2. The difference in the median costs and annual income between different subgroups**

| Character       | No. | Annual income             | Direct cost       | Indirect cost    | Total cost         |
|-----------------|-----|---------------------------|-------------------|------------------|--------------------|
| Sex             |     |                           |                   |                  |                    |
| Male            | 91  | 1,387.2 (975.0–1,875.0)   | 44.3 (28.0–77.0)  | 0.0 (0.0–269.0)  | 105.1 (38.0–310.0) |
| Female          | 60  | 1,500.0 (1,125.0–2,250.0) | 64.4 (31.0–112.0) | 0.0 (0.0–375.0)  | 173.9 (62.0–457.0) |
| p-value*        |     | 0.322                     | 0.02              | 0.343            | 0.089              |
| Breadwinner     |     |                           |                   |                  |                    |
| Patient         | 85  | 1,387.5 (900.0–1,875.0)   | 47.2 (28.0–85.0)  | 0.0 (0.0–219.0)  | 106.9 (39.0–262.0) |
| Another member  | 66  | 1,500.0 (1,125.0–2,250.0) | 55.5 (30.0–101.0) | 84.4 (0.0–375.0) | 182.2 (53.0–450.0) |
| p-value*        |     | 0.072                     | 0.306             | 0.093            | 0.054              |
| COVID-19        |     |                           |                   |                  |                    |
| Pre-lockdown    | 126 | 1,500.0 (1,125.0–2,250.0) | 53.9 (31.0–99.0)  | 0.0 (0.0–303.0)  | 137.0 (45.0–371.0) |
| Early lockdown  | 25  | 1,125.0 (938.0–15,000.0)  | 33.8 (37.0–74.0)  | 0.0 (0.0–250.0)  | 97.5 (32.0–272.0)  |
| p-value*        |     | 0.044                     | 0.107             | 0.831            | 0.324              |
| Type of TB      |     |                           |                   |                  |                    |
| Pulmonary       | 92  | 1,387.5 (1,069.0–1,950.0) | 51.4 (32.0–92.0)  | 0.0 (0.0–188.0)  | 137.0 (45.0–256.0) |
| Extra-pulmonary | 59  | 1,500.0 (1,050.0–2,250.0) | 45.0 (26.0–98.0)  | 0.0 (0.0–400.0)  | 117.5 (43.0–486.0) |
| p-value*        |     | 0.622                     | 0.378             | 0.250            | 0.324              |

Values are presented as mediana (IQR).

\*Using the Mann-Whitney test.

COVID-19: coronavirus disease 2019; TB: tuberculosis; IQR: interquartile range.
