# Supplementary material for: Assessment of Household Catastrophic Total Cost of Tuberculosis and Its Determinants in Cairo: Prospective Cohort Study
Source: PubMed Central journal article supplement — Tuberc Respir Dis (Seoul). 2021 Sep 3;85(2):165–74. doi: 10.4046/trd.2021.0028 (PMC8987667; doi:10.4046/trd.2021.0028), 2021-09-03
Supplement: trd-2021-0028-suppl3.pdf [file trd-2021-0028-suppl3.pdf]

**Supplementary Table S3. The estimated cost (US\$\*) incurred by TB patients according breeding status**

| Cost           | Breeding status      | No. | Pre-treatment                          | Treatment Period         |                          |                          | Total period               |
|----------------|----------------------|-----|----------------------------------------|--------------------------|--------------------------|--------------------------|----------------------------|
|                |                      |     | Pre-diagnosis                          | First 2 mo               | Second 2 mo              | Third 2 mo               | Entire illness             |
| Medical        | Patient              | 85  | 15.0 (3.1–29.1)<br>[28.3] <sup>†</sup> | 0.0 (0.0–0.6)<br>[3.2]   | 0.0 (0.0–0.0)<br>[2.0]   | 0.0 (0.0–0.0)<br>[4.5]   | 18.8 (6.3–38.1)<br>[12.6]  |
|                | Others               | 66  | 15.8 (10.8–22.8)<br>[26.1]             | 0.0 (0.0–0.0)<br>[1.8]   | 0.0 (0.0–0.0)<br>[1.8]   | 0.0 (0.0–0.0)<br>[2.9]   | 17.5 (12.8–25.3)<br>[10.6] |
|                | p-value <sup>*</sup> |     | 0.375                                  | 0.330                    | 0.891                    | 0.649                    | 0.391                      |
| Travel         | Patient              | 85  | 3.8 (1.3–12.5)<br>[13.8]               | 5.0 (2.6–9.7)<br>[12.7]  | 3.8 (1.9–6.6)<br>[11.8]  | 2.5 (1.3–3.8)<br>[10.1]  | 21.3 (12.5–28.8)<br>[12.5] |
|                | Others               | 66  | 6.3 (2.5–15.6)<br>[16.2]               | 5.1 (3.1–8.9)<br>[10.3]  | 3.2 (2.2–5.0)<br>[6.7]   | 1.9 (1.2–3.8)<br>[5.2]   | 21.6 (12.5–34.4)<br>[10.6] |
|                | p-value <sup>*</sup> |     | 0.065                                  | 0.928                    | 0.303                    | 0.558                    | 0.540                      |
| Food           | Patient              | 85  | 0.0 (0.0–2.5)<br>[5.9]                 | 0.0 (0.0–2.3)<br>[7.0]   | 0.0 (0.0–0.0)<br>[8.3]   | 0.0 (0.0–0.0)<br>[5.2]   | 0.0 (0.0–11.8)<br>[6.6]    |
|                | Others               | 66  | 0.8 (0.0–4.9)<br>[4.7]                 | 0.0 (0.0–0.0)<br>[6.3]   | 0.0 (0.0–0.0)<br>[7.9]   | 0.0 (0.0–0.0)<br>[6.8]   | 3.4 (0.0–15.2)<br>[6.2]    |
|                | p-value <sup>*</sup> |     | 0.030                                  | 0.462                    | 0.674                    | 0.311                    | 0.100                      |
| Total direct   | Patient              | 85  | 22.5 (6.9–56.9)<br>[48.1]              | 8.4 (4.1–15.8)<br>[22.9] | 5.0 (2.5–9.4)<br>[22.1]  | 2.5 (1.3–5.0)<br>[19.9]  | 47.2 (28.8–79.9)<br>[31.8] |
|                | Others               | 66  | 27.2 (16.6–67.0)<br>[47.0]             | 7.5 (3.8–13.6)<br>[18.4] | 3.8 (2.4–9.4)<br>[16.5]  | 2.5 (1.3–6.7)<br>[14.9]  | 55.5 (30.5–99.6)<br>[27.5] |
|                | p-value <sup>*</sup> |     | 0.115                                  | 0.526                    | 0.482                    | 0.765                    | 0.306                      |
| Total indirect | Patient              | 85  | 0.0 (0.0–62.5)<br>[51.9]               | 0.0 (0.0–84.4)<br>[77.1] | 0.0 (0.0–28.1)<br>[77.9] | 0.0 (0.0–0.0)<br>[80.2]  | 0.0 (0.0–187.5)<br>[68.2]  |
|                | Others               | 66  | 12.5 (0.0–93.8)<br>[52.9]              | 0.0 (0.0–93.8)<br>[81.6] | 0.0 (0.0–93.8)<br>[83.5] | 0.0 (0.0–93.8)<br>[85.1] | 84.4 (0.0–375.0)<br>[72.5] |
|                | p-value <sup>*</sup> |     | 0.137                                  | 0.162                    | 0.028                    | 0.003                    | 0.093                      |
| Total cost     | Patient              | 85  | 59.4 (18.8–96.3)                       | 17.9 (6.6–91.9)          | 7.5 (3.8–50.0)           | 3.8 (1.8–17.5)           | 106.9 (41.3–258.8)         |
|                | Others               | 66  | 82.6 (26.9–129.0)                      | 30.3 (5.6–115.6)         | 12.2 (3.0–103.1)         | 16.9 (1.9–95.6)          | 182.2 (54.7–442.5)         |
|                | p-value <sup>*</sup> |     | 0.042                                  | 0.644                    | 0.339                    | 0.022                    | 0.054                      |

Values are presented as median (IQR) [%].

\*One US\$=16 Egyptian pound (EGP) using mean UN exchange rate for the USD in December 2019. <sup>†</sup>Percentage equal mean of the cell divided by the mean of the total column. <sup>\*</sup>Using the Mann-Whitney test.

TB: tuberculosis; IQR: interquartile range.
