# Supplementary material for: Assessment of Household Catastrophic Total Cost of Tuberculosis and Its Determinants in Cairo: Prospective Cohort Study
Source: PubMed Central journal article supplement — Tuberc Respir Dis (Seoul). 2021 Sep 3;85(2):165–74. doi: 10.4046/trd.2021.0028 (PMC8987667; doi:10.4046/trd.2021.0028), 2021-09-03
Supplement: trd-2021-0028-suppl4.pdf [file trd-2021-0028-suppl4.pdf]

**Supplementary Table S4. The estimated cost (US\$\*) incurred by TB patients according to pre/post-COVID-19 lockdown**

| Cost           | COVID-19 lockdown    | No. | Pre-treatment                          | Treatment period         |                          |                          | Total period               |
|----------------|----------------------|-----|----------------------------------------|--------------------------|--------------------------|--------------------------|----------------------------|
|                |                      |     | Pre-diagnosis                          | First 2 mo               | Second 2 mo              | Third 2 mo               | Entire illness             |
| Medical        | Pre-lockdown         | 126 | 16.3 (6.3–30.0)<br>[28.2] <sup>†</sup> | 0.0 (0.0–0.0)<br>[2.7]   | 0.0 (0.0–0.0)<br>[1.9]   | 0.0 (0.0–0.0)<br>[3.8]   | 18.8 (11.3–40.0)<br>[11.9] |
|                | Post-lockdown        | 25  | 14.4 (5.0–22.2)<br>[21.6]              | 0.0 (0.0–0.0)<br>[1.1]   | 0.0 (0.0–0.0)<br>[2.3]   | 0.0 (0.0–0.0)<br>[2.2]   | 14.4 (8.1–22.5)<br>[10.1]  |
|                | p-value <sup>‡</sup> |     | 0.223                                  | 0.281                    | 0.842                    | 0.474                    | 0.164                      |
| Travel         | Pre-lockdown         | 126 | 5.6 (1.3–12.7)<br>[13.7]               | 5.6 (2.9–9.4)<br>[11.43] | 3.8 (1.9–6.3)<br>[8.71]  | 2.1 (1.3–3.8)<br>[7.2]   | 21.9 (12.5–31.3)<br>[10.9] |
|                | Post-lockdown        | 25  | 4.7 (0.8–13.8)<br>[22.2]               | 4.4 (1.8–6.8)<br>[12.4]  | 3.0 (2.2–3.8)<br>[11.4]  | 1.9 (1.1–3.1)<br>[7.7]   | 16.3 (10.9–24.4)<br>[15.5] |
|                | p-value <sup>‡</sup> |     | 0.870                                  | 0.068                    | 0.343                    | 0.303                    | 0.292                      |
| Food           | Pre-lockdown         | 126 | 0.0 (0.0–3.8)<br>[5.8]                 | 0.0 (0.0–3.3)<br>[6.6]   | 0.0 (0.0–0.0)<br>[7.9]   | 0.0 (0.0–0.0)<br>[7.1]   | 1.6 (0.0–15.6)<br>[6.6]    |
|                | Post-lockdown        | 25  | 0.0 (0.0–1.9)<br>[3.2]                 | 0.0 (0.0–0.0)<br>[7.4]   | 0.0 (0.0–0.0)<br>[9.6]   | 0.0 (0.0–0.0)<br>[0.7]   | 0.0 (0.0–4.7)<br>[4.8]     |
|                | p-value <sup>‡</sup> |     | 0.474                                  | 0.425                    | 0.894                    | 0.145                    | 0.311                      |
| Total direct   | Pre-lockdown         | 126 | 26.6 (12.1–61.7)<br>[47.7]             | 8.5 (4.3–15.0)<br>[20.7] | 4.7 (2.5–9.4)<br>[18.5]  | 2.6 (1.3–5.6)<br>[18.1]  | 53.9 (30.9–98.4)<br>[29.4] |
|                | Post-lockdown        | 25  | 18.8 (8.8–43.3)<br>[47.1]              | 4.4 (2.8–9.1)<br>[20.8]  | 3.1 (2.5–12.2)<br>[23.3] | 1.9 (1.1–4.1)<br>[10.6]  | 33.8 (27.1–58.5)<br>[30.4] |
|                | p-value <sup>‡</sup> |     | 0.295                                  | 0.022                    | 0.709                    | 0.146                    | 0.107                      |
| Total indirect | Pre-lockdown         | 126 | 0.0 (0.0–79.7)<br>[52.4]               | 0.0 (0.0–93.8)<br>[79.3] | 0.0 (0.0–75.8)<br>[81.5] | 0.0 (0.0–62.5)<br>[81.9] | 0.0 (0.0–300.0)<br>[70.6]  |
|                | Post-lockdown        | 25  | 0.0 (0.0–62.5)<br>[52.9]               | 0.0 (0.0–78.1)<br>[79.2] | 0.0 (0.0–62.5)<br>[76.7] | 0.0 (0.0–62.5)<br>[89.4] | 0.0 (0.0–250.0)<br>[69.6]  |
|                | p-value <sup>‡</sup> |     | 0.973                                  | 0.299                    | 0.409                    | 0.917                    | 0.831                      |
| Total cost     | Pre-lockdown         | 126 | 67.8 (22.5–120.2)                      | 24.1 (6.6–105.0)         | 9.4 (3.4–94.1)           | 4.9 (1.9–767.0)          | 137.0 (45.0–369.4)         |
|                | Post-lockdown        | 25  | 63.0 (15.5–115.6)                      | 9.4 (4.1–81.2)           | 6.8 (2.8–64.7)           | 3.0 (1.3–66.3)           | 97.5 (33.8–265.0)          |
|                | p-value <sup>‡</sup> |     | 0.620                                  | 0.078                    | 0.530                    | 0.382                    | 0.324                      |

Values are presented as median (IQR) [%].

\*One US\$=16 Egyptian pound (EGP) using mean UN exchange rate for the USD in December 2019. <sup>†</sup>Percentage equal mean of the cell divided by the mean of the total column. <sup>‡</sup>Using the Mann-Whitney test.

TB: tuberculosis; COVID-19: coronavirus disease 2019; IQR: interquartile range.
