# Supplementary material for: Assessment of Household Catastrophic Total Cost of Tuberculosis and Its Determinants in Cairo: Prospective Cohort Study
Source: PubMed Central journal article supplement — Tuberc Respir Dis (Seoul). 2021 Sep 3;85(2):165–74. doi: 10.4046/trd.2021.0028 (PMC8987667; doi:10.4046/trd.2021.0028), 2021-09-03
Supplement: trd-2021-0028-suppl5.pdf [file trd-2021-0028-suppl5.pdf]

**Supplementary Table S5. The estimated cost (US\$\*) incurred by TB patients according to the type of TB**

| Cost           | Type of TB patient   | No. | Pre-treatment                          | Treatment Period          |                           |                          | Total Period               |
|----------------|----------------------|-----|----------------------------------------|---------------------------|---------------------------|--------------------------|----------------------------|
|                |                      |     | Pre-diagnosis                          | First 2 mo                | Second 2 mo               | Third 2 mo               | Entire illness             |
| Medical        | Pulmonary            | 92  | 16.3 (6.3–29.5)<br>[29.9] <sup>†</sup> | 0.0 (0.0–1.9)<br>[3.9]    | 0.0 (0.0–0.0)<br>[2.9]    | 0.0 (0.0–0.0)<br>[5.7]   | 19.5 (11.3–40.3)<br>[14.2] |
|                | Extra-pulmonary      | 59  | 14.4 (6.3–23.8)<br>[23.6]              | 0.0 (0.0–0.0)<br>[0.9]    | 0.0 (0.0–0.0)<br>[0.9]    | 0.0 (0.0–0.0)<br>[1.9]   | 15.6 (69.1–23.8)<br>[8.7]  |
|                | p-value <sup>*</sup> |     | 0.622                                  | 0.005                     | 0.162                     | 0.425                    | 0.241                      |
| Travel         | Pulmonary            | 92  | 5.6 (1.3–12.5)<br>[14.6]               | 5.5 (2.5–10.0)<br>[13.3]  | 3.8 (1.9–6.3)<br>[11.3]   | 2.5 (1.3–3.8)<br>[10.6]  | 21.1 (12.8–31.3)<br>[13.0] |
|                | Extra-pulmonary      | 59  | 3.8 (1.3–13.1)<br>[15.6]               | 4.5 (3.1–7.8)<br>[9.4]    | 3.3 (1.9–5.6)<br>[6.8]    | 1.9 (0.9–2.5)<br>[4.8]   | 21.9 (10.4–28.3)<br>[9.9]  |
|                | p-value <sup>*</sup> |     | 0.825                                  | 0.589                     | 0.731                     | 0.338                    | 0.782                      |
| Food           | Pulmonary            | 92  | 0.0 (0.0–3.6)<br>[5.7]                 | 0.0 (0.0–1.5)<br>[6.3]    | 0.0 (0.0–0.0)<br>[10.8]   | 0.0 (0.0–0.0)<br>[7.1]   | 0.0 (0.0–14.5)<br>[7.0]    |
|                | Extra-pulmonary      | 59  | 0.6 (0.0–3.8)<br>[4.9]                 | 0.0 (0.0–3.1)<br>[7.1]    | 0.0 (0.0–0.0)<br>[5.5]    | 0.0 (0.0–0.0)<br>[5.4]   | 2.5 (0.0–12.5)<br>[5.7]    |
|                | p-value <sup>*</sup> |     | 0.147                                  | 0.953                     | 0.505                     | 0.784                    | 0.485                      |
| Total direct   | Pulmonary            | 92  | 27.5 (11.4–56.4)<br>[50.2]             | 8.8 (4.4–16.3)<br>[23.5]  | 5.0 (2.6–9.4)<br>[24.9]   | 2.8 (1.3–5.6)<br>[23.4]  | 51.5 (32.2–91.7)<br>[34.3] |
|                | Extra-pulmonary      | 59  | 20.6 (12.3–57.2)<br>[44.1]             | 6.3 (3.8–12.5)<br>[17.3]  | 3.8 (2.1–7.5)<br>[13.2]   | 1.9 (1.3–5.0)<br>[12.0]  | 45.0 (25.9–97.9)<br>[24.3] |
|                | p-value <sup>*</sup> |     | 0.678                                  | 0.171                     | 0.151                     | 0.379                    | 0.378                      |
| Total indirect | Pulmonary            | 92  | 0.0 (0.0–67.2)<br>[49.8]               | 0.0 (0.0–84.4)<br>[76.5]  | 0.0 (0.0–35.9)<br>[75.1]  | 0.0 (0.0–0.0)<br>[76.6]  | 0.0 (0.0–187.5)<br>[65.7]  |
|                | Extra-pulmonary      | 59  | 0.0 (0.0–93.8)<br>[55.9]               | 0.0 (0.0–125.0)<br>[82.7] | 0.0 (0.0–100.0)<br>[86.8] | 0.0 (0.0–93.8)<br>[87.9] | 0.0 (0.0–390.6)<br>[75.7]  |
|                | p-value <sup>*</sup> |     | 0.507                                  | 0.298                     | 0.046                     | 0.005                    | 0.250                      |
| Total cost     | Pulmonary            | 92  | 62.8 (22.1–115.9)                      | 21.6 (7.1–93.7)           | 8.4 (3.6–56.9)            | 3.8 (1.6–34.4)           | 137.0 (44.6–256.3)         |
|                | Extra-pulmonary      | 59  | 72.2 (22.7–115.8)                      | 13.1 (4.4–134.7)          | 10.0 (2.8–107.8)          | 15.6 (9.1–23.8)          | 117.5 (42.9–485.6)         |
|                | p-value <sup>*</sup> |     | 0.389                                  | 0.891                     | 0.489                     | 0.053                    | 0.324                      |

Values are presented as median (IQR) [%].

\*One US\$=16 Egyptian pound (EGP) using mean UN exchange rate for the USD in December 2019. <sup>†</sup>Percentage equal mean of the cell divided by the mean of the total column. <sup>\*</sup>Using the Mann-Whitney test.

TB: tuberculosis; IQR: interquartile range.
